# Supplementary material for: Screening for Chemical Contributions to Breast Cancer Risk: A Case Study for Chemical Safety Evaluation
Source: PubMed Central journal article supplement (PMC4671249; doi:10.1289/ehp.1408337), 2015-06-02
Supplement: ehp.1408337.s001.acco.pdf [file ehp.1408337.s001.acco.pdf]

**Note to Readers:** *EHP* strives to ensure that all journal content is accessible to all readers. However, some figures and Supplemental Material published in *EHP* articles may not conform to 508 standards due to the complexity of the information being presented. If you need assistance accessing journal content, please contact [ehp508@niehs.nih.gov](mailto:ehp508@niehs.nih.gov). Our staff will work with you to assess and meet your accessibility needs within 3 working days.

## **Supplemental Material**

### **Screening for Chemical Contributions to Breast Cancer Risk: A Case Study for Chemical Safety Evaluation**

Megan R. Schwarzman, Janet M. Ackerman, Shanaz H. Dairkee, Suzanne E. Fenton, Dale Johnson, Kathleen M. Navarro, Gwendolyn Osborne, Ruthann A. Rudel, Gina M. Solomon, Lauren Zeise, and Sarah Janssen

#### **Table of Contents**

#### **Breast Cancer and Chemicals Policy Project: Expert Panel**

#### **Keywords for searches of assays in Tox21 and ToxCast**

**Table S1.** Assays from ToxCast, Tox21, and the EPA Endocrine Disruptor Screening Program that target breast cancer-relevant endpoints

#### **References**

#### **References for Figure 3, Pilot Test of the HIA-BC**

Diethylstilbestrol  
HRT (conjugated equine estrogens + medroxyprogesterone acetate)  
Ethylene Oxide  
Tobacco Smoke  
Medroxyprogesterone Acetate (MPA)  
TCDD  
DDT  
PFOA  
Vinyl chloride  
Arsenic  
Caprolactam

## Breast Cancer and Chemicals Policy Project: Expert Panel†

### Project Leaders:

#### **Sarah Janssen, MD, PhD, MPH (Co-Director)**

Scientist, Natural Resources Defense Council  
Assistant Clinical Professor  
Occupational & Environmental Medicine  
UC, San Francisco, CA

#### **Megan Schwarzman, MD, MPH (PI and Co-Director)**

Center for Occupational and Environmental Health,  
UC Berkeley; and  
Clinical Instructor, Family and Community Medicine  
UC, San Francisco, CA

### Panel Members:

#### **Susan Braun, MA**

Executive Director, Commonweal  
Bolinas, CA

#### **Vincent James Cogliano, PhD**

Head, IARC Monographs Programme  
International Agency for Research on Cancer  
World Health Organization  
Lyon, France

#### **\*Shanaz Dairkee, PhD**

California Pacific Medical Center Research Institute  
San Francisco, CA

#### **Suzanne Fenton, PhD**

Reproductive Endocrinologist  
Cellular and Molecular Pathology Branch  
National Toxicology Program, NIEHS  
Durham, NC

#### **William H. Goodson, III, MD**

Senior Clinical Research Scientist  
California Pacific Medical Center Research Institute  
San Francisco, CA

#### **\*Joe Guth, PhD, JD**

Legal Director  
Science and Environmental Health Network  
Albany, CA

#### **Dale Johnson, PharmD, PhD**

Adjunct Professor, Nutritional Science & Toxicology  
Dept, College of Natural Resources  
UC Berkeley, CA

#### **Jean Latimer, PhD**

UPCI Hillman Cancer Center  
School of Medicine  
University of Pittsburgh, PA

#### **Ron Melnick, PhD**

Retired Associate, Environmental Toxicology  
Program  
National Institute of Environmental Health Sciences  
Research Triangle Park, NC

#### **Rachel Morello-Frosch, PhD, MPH**

Associate Professor  
Environmental Sciences Policy and Management  
College of Natural Resources  
UC Berkeley, CA

#### **Ruthann A. Rudel, MS**

Senior Scientist, Toxicology and Environmental  
Health Risk Assessment  
Silent Spring Institute  
Newton, MA

#### **\*Gina Solomon, MD, MPH**

Senior Scientist, Natural Resources Defense Council  
Associate Clinical Professor  
Occupational and Environmental Medicine and  
Internal Medicine  
UC, San Francisco, CA

#### **Carlos Sonnenschein, MD**

Professor, Dept. of Anatomy and Cellular Biology  
Tufts University School of Medicine  
Boston, MA

#### **\*Lauren Zeise, PhD**

Chief, Reproductive and Cancer Hazard Assessment  
Office of Environmental Health Hazard Assessment  
Cal/EPA Oakland, CA

†Affiliations at the time the project was performed in 2010

\* Member of the core Advisory Panel Group

## Keywords for searches of assays in Tox21 and ToxCast

Searches were case insensitive

Keywords in the same group are separated by

genotoxicity:

mutation|chromosome|chromosomal|micronuclei|micronucleus|adduct|repair|genotox

proliferative signaling: autocrine|growth factor|TGF|insulin|prolifer|EGFR

limitless replication: immortal|telome

invading apoptosis: apoptosis|apopto|BH3

avoiding immune destruction: immune

tumor promoting inflammation: inflamm|sensitization

angiogenesis: angiogenesis|blood vessel|vascul|VEGF|VCAM

energy regulation: energy|hypoxia|mitochondri|glycolysis

metastasis and invasion: metastasis|chemotaxis|cell

adhesion|differentiation|migration|motility|invasion|HGF

growth suppression: suppressor|suppression|CDK|contact

estrogen: estrogen|estradiol|estriol|estrone

steroidogenesis: steroido|HSD|estrone sulfatase|hydroxysteroid dehydrogenase

AHR: ahr|aryl hydrocarbon

aromatase: aromatase|CYP19|CYP-19|CYP 19

androgen: androgen|testosterone|\_AR\_

thyroid: thyroid

progesterone: progesterone|progesterin|progestagen|progestogen|pregnenolone

Her2: Her2|neu |cd340|P185|erbb2

breast: breast|mammary|MCF|MDA-kb2|T47D

cell cycle regulation: cell cycle|mitosis

xenobiotic metabolism:

xenobiotic|monooxygenase|oxidoreductase|transporter|glucuronosyltransferase

oxidative stress: oxidative

**Table S1.** Assays from ToxCast, Tox21, and the EPA Endocrine Disruptor Screening Program that Target Breast Cancer-Relevant Endpoints.

| Category                                                                | Endpoint/pathway                                                                                                  | ToxCast/Tox21                                                                                                                                                                                                           |                                   | EDSP                 |
|-------------------------------------------------------------------------|-------------------------------------------------------------------------------------------------------------------|-------------------------------------------------------------------------------------------------------------------------------------------------------------------------------------------------------------------------|-----------------------------------|----------------------|
|                                                                         |                                                                                                                   | Assays <sup>a</sup>                                                                                                                                                                                                     | In/from breast cells <sup>b</sup> | System               |
| Steroid hormones                                                        | Estrogen receptor $\alpha$                                                                                        | receptor binding/ dimerization/ transcriptional activity; proliferation in estrogen dependent breast cells                                                                                                              | yes                               | in vitro and in vivo |
|                                                                         | Estrogen receptor $\beta$                                                                                         | <i>protein dimerization (no receptor binding or transcriptional activity assays)</i>                                                                                                                                    |                                   | <sup>c</sup>         |
|                                                                         | Androgen receptor                                                                                                 | receptor binding/ coactivator recruitment/ transcriptional activity                                                                                                                                                     | yes                               | in vitro and in vivo |
|                                                                         | Progesterone receptor                                                                                             | <i>receptor binding (no transcriptional activity assays)</i>                                                                                                                                                            | yes                               |                      |
|                                                                         | Aromatase                                                                                                         | <i>inhibition/activity (no expression assays)</i>                                                                                                                                                                       | yes                               | in vitro             |
|                                                                         | Estrogen metabolism                                                                                               | CYP, SULT, other enzyme activity                                                                                                                                                                                        |                                   |                      |
|                                                                         | Steroidogenesis (other)                                                                                           | steroid intermediate levels                                                                                                                                                                                             |                                   | in vitro             |
| Other molecular targets involved in endocrine signaling and development | Thyroid receptor                                                                                                  | receptor transcriptional activity/ binding                                                                                                                                                                              |                                   | in vivo              |
|                                                                         | Thyroid (other)                                                                                                   | --                                                                                                                                                                                                                      |                                   |                      |
|                                                                         | Her2                                                                                                              | --                                                                                                                                                                                                                      |                                   |                      |
|                                                                         | Estrogen-related receptor                                                                                         | <i>receptor transcriptional activity (no reference compound)</i>                                                                                                                                                        |                                   | <sup>c</sup>         |
|                                                                         | Aryl hydrocarbon receptor                                                                                         | transcriptional activity                                                                                                                                                                                                |                                   |                      |
|                                                                         | Prolactin                                                                                                         | --                                                                                                                                                                                                                      |                                   |                      |
|                                                                         | Growth factors                                                                                                    | growth factor/cytokine (e.g. TGF $\beta$ , IFN-g) expression; GF receptor (e.g. EGFR) kinase activity and expression <sup>d</sup>                                                                                       |                                   |                      |
| PPAR ( $\alpha$ , $\gamma$ , $\delta$ )                                 | receptor transcriptional activity/binding                                                                         |                                                                                                                                                                                                                         |                                   |                      |
| ROR                                                                     | transcriptional activity                                                                                          |                                                                                                                                                                                                                         |                                   |                      |
| Epigenetic programming                                                  | <i>histone deacetylation inhibition, mitochondrial function (few or no assays for other epigenetic endpoints)</i> |                                                                                                                                                                                                                         |                                   |                      |
| Carcinogenesis                                                          | Genotoxicity                                                                                                      | <i>p53, GADD45A levels; HCS DNA damage/ texture (no assays with consistent relationship to standard genotoxicity tests); cytotoxicity in DNA repair deficient cell lines; ATAD5</i>                                     |                                   |                      |
|                                                                         | Inflammation                                                                                                      | CEPB, NF-KB activity; OPRL1, P2RY1 binding; CD 40, TNFa, cytokine (e.g. IL1a, IL8, cxcl9, cxcl10, ccl2) levels <sup>d</sup>                                                                                             |                                   |                      |
|                                                                         | Xenobiotic metabolizing enzymes                                                                                   | CYP, SULT, UGT, other enzyme activity/expression <sup>d</sup>                                                                                                                                                           |                                   |                      |
|                                                                         | Cellular stress (including oxidative)                                                                             | transcriptional activity of stress-related proteins; HCS pH2AX; HCS pcJun <sup>d</sup>                                                                                                                                  |                                   |                      |
| Other hallmarks of cancer                                               | Evading growth suppressors                                                                                        | p53 levels; HCS pcJun; p38 inhibition <sup>d</sup>                                                                                                                                                                      |                                   |                      |
|                                                                         | Angiogenesis                                                                                                      | HIF1a reporter gene assay; proliferation, vascular cell adhesion module (VCAM) in vascular cells; plasminogen activator-related protein (e.g. PLAT, PLAU, PLAU, SERPINE, THBD) levels <sup>d</sup>                      |                                   |                      |
|                                                                         | Cell cycle changes                                                                                                | mitotic arrest/cell cycle arrest; cell cycle related gene expression                                                                                                                                                    | yes                               |                      |
|                                                                         | Activating tissue invasion and metastasis                                                                         | cell adhesion/extracellular matrix-related (e.g. ICAM, VCAM, MMP1, PLAT) protein levels; PDE5A activation/inhibition, PPARa/PPARg binding, transcriptional activity <sup>d</sup>                                        |                                   |                      |
|                                                                         | Avoiding immune destruction                                                                                       | TCF/b-cat (T-cell specific) transcriptional activity; ISRE transcriptional activity; NF-kB transcriptional activity; proliferation, cytotoxicity, and protein levels in peripheral blood mononuclear cells <sup>d</sup> |                                   |                      |
|                                                                         | Evading apoptosis                                                                                                 | HCS apoptosis assays; caspase, PDE5, AR inhibition/activity; MYC, p53 protein levels <sup>d</sup>                                                                                                                       | yes                               |                      |
|                                                                         | Replicative immortality                                                                                           | -- <sup>e</sup>                                                                                                                                                                                                         |                                   |                      |
| Mammary gland development                                               | Morphology                                                                                                        | -- <sup>f, g</sup>                                                                                                                                                                                                      |                                   |                      |
|                                                                         | AR, ER in developing MG                                                                                           | -- <sup>f</sup>                                                                                                                                                                                                         |                                   |                      |
| Other organism-level endocrine effects                                  | Reproductive development (e.g. AGD, nipple retention, pubertal timing)                                            | -- <sup>f</sup>                                                                                                                                                                                                         |                                   | in vivo              |
|                                                                         | Circulating hormone levels                                                                                        | -- <sup>f</sup>                                                                                                                                                                                                         |                                   | in vivo              |

Italics indicate that there is an assay related to the endpoint, but that there are also some gaps.

<sup>a</sup> Several assays in ToxCast provide information about multiple cancer hallmarks; important assays may not be listed under every relevant pathway if they are listed elsewhere in this table.

<sup>b</sup> Indicates if any assays in the category are performed in breast cells, or in the case of cell free assays, using components derived from breast cells.

<sup>c</sup> In vivo estrogenicity tests may reflect some activity from these alternate receptors.

<sup>d</sup> Kleinstreuer et al. (2013) mapped many additional assays to these processes based on target genes' inclusion in Gene Ontology categories matching keywords related to the hallmarks of cancer.

<sup>e</sup> Kleinstreuer et al. (2013) list SIRT2 (involved in chromatin silencing at the telomere) under limitless replication/telomerase.

<sup>f</sup> No in vitro tests exist for these organ and organism-level endpoints, although validated in vivo tests are available.

<sup>g</sup> Protocols for evaluating the morphology of the developing mammary gland are available from the OECD (2008) and have been discussed by Rudel et al. (2011).

## References

Kleinstreuer NC, Dix DJ, Houck KA, Kavlock RJ, Knudsen TB, Martin MT, et al. 2013. In vitro perturbations of targets in cancer hallmark processes predict rodent chemical carcinogenesis. *Toxicol Sci* 131(1):41–55.

OECD (Organisation for Economic Co-operation and Development). 2008. Updated TG 407 Histopathology Guidance Document, Endocrine Disruption: Guidelines for Histological Evaluation, Part 4: Mammary Gland. Available: <http://www.oecd.org/chemicalsafety/testing/40613059.pdf> [accessed 30 April 2015].

Rudel RA, Fenton SE, Ackerman JM, Euling SY, Makris SL. 2011. Environmental exposures and mammary gland development: state of the science, public health implications, and research recommendations. *Environ Health Perspect* 119(8):1053–1061.

U.S. EPA. 2013. Archived ToxCast™ Data and Publication Data. Available: [http://www.epa.gov/ncct/toxcast/data\\_archive.html](http://www.epa.gov/ncct/toxcast/data_archive.html) [accessed 30 April 2015].

## References for Figure 3, Pilot Test of the HIA-BC

References are organized by chemical, in order of their appearance in Figure 3.

### Diethylstilbestrol

- Benachour N, Moslemi S, Sipahutar H, Seralini GE. 2007. Cytotoxic effects and aromatase inhibition by xenobiotic endocrine disruptors alone and in combination. *Toxicol Appl Pharmacol* 222:129-40.
- Chen H, Geng CZ, Kuang G, Wang GL, Fan ZL, Wu XD. 2007. Diethylstilbestrol intervention in carcinogenesis of breast cancer in wistar rats. *Ai Zheng* 26:596-600.
- Colerangle JB, Roy D. 1996. Exposure of environmental estrogenic compound nonylphenol to noble rats alters cell kinetics in the mammary gland. *Endocrine* 4:115-122.
- Colerangle JB, Roy D. 1997. Profound effects of the weak environmental estrogen-like chemical bisphenol A on the growth of the mammary gland of Noble rats. *J Steroid Biochem Mol Biol* 60:153-160.
- Doherty L, Bromer J, Zhou Y, Aldad T, Taylor H. 2010. In utero exposure to diethylstilbestrol (DES) or bisphenol-A (BPA) increases EZH2 expression in the mammary gland: An epigenetic mechanism linking endocrine disruptors to breast cancer. *Horm Canc* 1:146-155.
- DuMond JW, Roy D. 2001. The inhibition of DNA repair capacity by stilbene estrogen in Leydig cells: its implications in the induction of instability in the testicular genome. *Mutat Res* 483:27-33.
- Fielden MR, Fong CJ, Haslam SZ, Zacharewski TR. 2002. Normal mammary gland morphology in pubertal female mice following in utero and lactational exposure to genistein at levels comparable to human dietary exposure. *Toxicol Lett* 133:181-191.
- Geier R, Adler S, Rashid G, and Klein A. 2010. The synthetic estrogen diethylstilbestrol (DES) inhibits the telomerase activity and gene expression of prostate cancer cells. *The Prostate* 70:1307-1312.
- Gell JS, Oh J, Rainey WE, Carr BR. 1998. Effect of estradiol on DHEAS production in the human adrenocortical cell line, H295R. *J Soc Gynecol Investig* 5:144-8.
- Glatt HR, Metzler M, Oesch F. 1979. Diethylstilbestrol and 11 derivatives: a mutagenicity study with *Salmonella typhimurium*. *Mutat Res* 67:113-21.
- Grosse Y, Baan R, Straif K, Secretan B, El Ghissassi F, Bouvard V, et al. 2009. A review of human carcinogens—Part A: pharmaceuticals. WHO International Agency for Research on Cancer Monograph Working Group. *Lancet Oncol* 10:13-4.
- Gupta C. 2000. The role of estrogen receptor, androgen receptor and growth factors in diethylstilbestrol-induced programming of prostate differentiation. *Urol Res* 28:223-9.
- Hovey RC, Asai-Sato M, Warri A, Terry-Koroma B, Colyn N, Ginsburg E, et al. 2005. Effects of neonatal exposure to diethylstilbestrol, tamoxifen, and toremifene on the BALB/c mouse mammary gland. *Biol Reprod* 72:423-435.
- IARC. 1987. International Agency for Research on Cancer. Overall Evaluations of Carcinogenicity: An Updating of *IARC Monographs Volumes 1 to 42*. IARC Monographs on the Evaluation of Carcinogenic Risks to Humans. Supplement 7. World Health Organization. Lyon, France.

IARC. 2012. International Agency for Research on Cancer. A Review of Human Carcinogens: Pharmaceuticals. IARC Monographs on the Evaluation of Carcinogenic Risks to Humans. Volume 100A. World Health Organization. Lyon, France.

National Toxicology Program. 2002. Current Status of Test Methods for Detecting Endocrine Disruptors: *In Vitro* Estrogen Receptor Transcriptional Activation Assays, NIH Publication No: 03-4505: Background Review Document. Page E-7.

Ninomiya K, Kawaguchi H, Souda M, Taguchi S, Funato M, Umekita Y, et al. 2007. Effects of neonatally administered diethylstilbestrol on induction of mammary carcinomas induced by 7, 12-dimethylbenz(a)anthracene in female rats. *Toxicol Pathol* 35:813-818.

Odum J, Pyrah IT, Foster JR, Van Miller JP, Joiner RL, Ashby J. 1999. Comparative activities of p-nonylphenol and diethylstilbestrol in noble rat mammary gland and uterotrophic assays. *Regul Toxicol Pharmacol* 29:184-195.

Odum J, Pyrah IT, Soames AR, Foster JR, Van Miller JP, Joiner RL, et al. 1999. Effects of p-nonylphenol (NP) and diethylstilbestrol (DES) on the Alderley Park (Alpk) rat: comparison of mammary gland and uterus sensitivity following oral gavage or implanted mini-pumps. *J Appl Toxicol* 19:367-378.

Tomooka Y, Bern HA. 1982. Growth of mouse mammary glands after neonatal sex hormone treatment. *J Natl Cancer Inst* 69:1347-1352.

Warita, K, Mitsuhashi, T, Sugawara, T, Tabuchi, Y, Tanida, T, Wang, Z-Y, et al. 2010. Direct effects of diethylstilbestrol on the gene expression of the cholesterol side-chain cleavage enzyme (P450scc) in testicular Leydig cells. *Life Sci* 87:281-5.

Wright SC, Zhong J, Larrick JW. 1994. Inhibition of Apoptosis as a mechanism of tumor promotion. *FASEB J* 8:654-60.

Yeh S, Miyamoto H, Shima H, Chang C. 1998. From estrogen to androgen receptor: A new pathway for sex hormones in prostate. *Proc Natl Acad Sci USA* 95:5527-32.

### **HRT (conjugated equine estrogens + medroxyprogesterone acetate)**

Conner P, Register TC, Skoog L, Tani E, von Schoultz B, Cline JM. 2005. Expression of p53 and markers for apoptosis in breast tissue during long-term hormone therapy in cynomolgus monkeys. *Am J Obstet Gynecol* 193:58-63.

Dinh H, Nathan L. 2002. Medroxyprogesterone acetate does not antagonize estrogen-induced increases in endothelium-dependent vasodilation: potential clinical implications. *Fertil Steril* 78:122-7.

Franke HR, Vermes I. 2003. Differential effects of progestogens on breast cancer cell lines. *Maturitas*. 46 Suppl 1:S55-8.

IARC. 2007 International Agency for Research on Cancer. Combined Estrogen-Progestogen Contraceptives and Combined Estrogen-Progestogen Menopausal Therapy. IARC Monographs on the Evaluation of Carcinogenic Risks to Humans. Volume 91. World Health Organization. Lyon, France.

IARC. 2012. International Agency for Research on Cancer. A Review of Human Carcinogens: Pharmaceuticals. IARC Monographs on the Evaluation of Carcinogenic Risks to Humans. Volume 100A. World Health Organization. Lyon, France.

- Luo S, Stojanovic M, Labrie C, Labrie F. 1997. Inhibitory Effect Of The Novel Anti-Estrogen Em-800 And Medroxyprogesterone Acetate On Estrone-Stimulated Growth Of Dimethylbenz[A]Anthracene-Induced Mammary Carcinoma In Rats. *Int J Cancer* 73:580-6.
- Mueck AO, Seeger H, Wallwiener D. 2003. Comparison of the proliferative effects of estradiol and conjugated equine estrogens on human breast cancer cells and impact of continuous combined progestogen addition. *Climacteric* 6:221-7.
- Seeger H, Wallwiener D, Mueck AO. 2003. The effect of progesterone and synthetic progestins on serum- and estradiol-stimulated proliferation of human breast cancer cells. *Horm Metab Res* 35:76-80.
- Tseng L, Mazella J, Sun B. 1986. Modulation of Aromatase Activity in Human Endometrial Stromal Cells by Steroids, Tamoxifen and RU 486. *Endocrinology* 118:1312-8.
- Vidal JD, Register TC, Gupta M, Cline JM. 2002. Estrogen replacement therapy induces telomerase RNA expression in the macaque endometrium. *Fertil Steril* 77:601-8.

### **Ethylene Oxide**

- Grosse Y, Baan R, Straif K, Secretan B, El Ghissassi F, Bouvard V, Altieri A, Coglianò V; WHO International Agency for Research on Cancer Monograph Working Group. 2007. Carcinogenicity of 1,3-butadiene, ethylene oxide, vinyl chloride, vinyl fluoride, and vinyl bromide. IARC Monographs on the Evaluation of Carcinogenic Risks to Humans. Volume 97. *Lancet Oncol* 8:679-80.
- IARC. 1994. International Agency for Research on Cancer. Some Industrial Chemicals. IARC Monographs on the Evaluation of Carcinogenic Risks to Humans. Volume 60. World Health Organization. Lyon, France.
- IARC. 2012. International Agency for Research on Cancer. A Review of Human Carcinogens: Chemical Agents and Related Occupations. IARC Monographs on the Evaluation of Carcinogenic Risks to Humans. Volume 100F. World Health Organization. Lyon, France.
- Pero RW, Widegren B, Högstedt B, Mitelman F. 1981. In vivo and in vitro ethylene oxide exposure of human lymphocytes assessed by chemical stimulation of unscheduled DNA synthesis. *Mutat Res* 83:271-89.
- Steenland K, Whelan E, Deddens J, Stayner L, Ward E. 2003. Ethylene oxide and breast cancer incidence in a cohort study of 7576 women (United States). *Cancer Causes Control* 14:531-9.

### **Tobacco Smoke**

- Barbieri RL, Gochberg J, Ryan KJ. 1986. Nicotine, cotinine, and anabasine inhibit aromatase in human trophoblast in vitro. *J Clin Invest* 77:1727-33.
- Hecht S. 2011. Tobacco Smoke Carcinogens and Lung Cancer. In: *Chemical Carcinogenesis* (Penning TM, ed). Humana Press, pp 53-74. Available: [http://link.springer.com/chapter/10.1007%2F978-1-61737-995-6\\_3?LI=true#page-1](http://link.springer.com/chapter/10.1007%2F978-1-61737-995-6_3?LI=true#page-1). [accessed 29 April 2015]
- IARC. 2012. International Agency for Research on Cancer. A Review of Human Carcinogens: Personal Habits and Indoor Combustions. IARC Monographs on the Evaluation of Carcinogenic Risks to Humans. Volume 100E. World Health Organization. Lyon, France.



IARC. 2004. International Agency for Research on Cancer. Tobacco Smoke and Involuntary Smoking. IARC Monographs on the Evaluation of Carcinogenic Risks to Humans. Volume 83. World Health Organization. Lyon, France.

Kadohama N, Shintani K, Osawa Y. 1993. Tobacco alkaloid derivatives as inhibitors of breast cancer aromatase. *Cancer Lett* 75:175-82.

Kapoor D, Jones TH. 2005. Smoking and hormones in health and endocrine disorders. *Eur J Endocrinol* 152:491-9.

Martin MB, Reiter R, Johnson M, Shah MS, Iann MC, Singh B, et al. 2007. Effects of Tobacco Smoke Condensate on Estrogen Receptor-alpha Gene Expression and Activity. *Endocrinology* 148:4676-86.

Yim HW, Slebos RJ, Randell SH, Umbach DM, Parsons AM, Rivera MP, et al. 2007. Smoking is associated with increased telomerase activity in short-term cultures of human bronchial epithelial cells. *Cancer Lett* 246:24-33.

### **Medroxyprogesterone Acetate (MPA)**

Franke HR, Vermes I. 2003. Differential effects of progestogens on breast cancer cell lines *Maturitas* 46:S55-8.

Ghatge RP, Jacobsen BM, Schittone SA, Horwitz KB. 2005. The progestational and androgenic properties of medroxyprogesterone acetate: gene regulatory overlap with dihydrotestosterone in breast cancer cells. *Breast Cancer Res* 7:R1036-50.

IARC. 1999. International Agency for Research on Cancer. Hormonal Contraception and Postmenopausal Hormonal Therapy. IARC Monographs on the Evaluation of Carcinogenic Risks to Humans. Volume 72. World Health Organization. Lyon, France.

Jeng MH, Parker CJ, Jordan VC. 1992. Estrogenic potential of progestins in oral contraceptives to stimulate human breast cancer cell proliferation. *Cancer Res* 52:6539-46.

Jordan VC, Jeng MH, Catherino WH, Parker CJ. 1993. The estrogenic activity of synthetic progestins used in oral contraceptives. *Cancer* 71:1501-5.

Lee TC, Miller WL, Auchus RJ. 1999. Medroxyprogesterone acetate and dexamethasone are competitive inhibitors of different human steroidogenic enzymes. *J Clin Endocrinol Metab* 84:2104-10.

Lee TC, Miller WL, Auchus RJ. 1999. Medroxyprogesterone acetate (MPA) inhibits pituitary-independent steroidogenesis by inhibiting 3  $\beta$ -hydroxysteroid dehydrogenase type II (3  $\beta$ -HSDII). *Pediatr Res* 45:93A-93A.

Li C, Beaver E, Tang MC, Porter P, Daling JR, Malone K. 2012. Effect of depo-medroxyprogesterone acetate on breast cancer risk among women 20-44 years of age. *Cancer Res* 72:2028-2035.

Martelli A, Mattioli F, Angiola M, Reimann R, Brambilla G. 2003. Species, sex and inter-individual differences in DNA repair induced by nine sex steroids in primary cultures of rat and human hepatocytes. *Mutat Res* 536:69-78.

Ory K, Lebeau J, Levalois C, Bishay K, Fouchet P, Allemand I, et al. 2001. Apoptosis inhibition mediated by medroxyprogesterone acetate treatment of breast cancer cell lines. *Breast Cancer Res Treat* 68:187-98.

- Poulin R, Baker D, Poirier D, Labrie F. 1991. Multiple actions of synthetic 'progestins' on the growth of ZR-75-1 human breast cancer cells: an in vitro model for the simultaneous assay of androgen, progestin, estrogen, and glucocorticoid agonistic and antagonistic activities of steroids. *Breast Cancer Res Treat* 17:197-210.
- Rosenfield A, Maine D, Rochat R, Shelton J, Hatcher RA. 1983. The Food and Drug Administration and Medroxyprogesterone Acetate. What Are the Issues? *JAMA* 249:2922-8.
- Seeger H, Wallwiener D, Mueck AO. 2003. Comparison of the effect of progesterone, medroxyprogesterone acetate and norethisterone on the proliferation of human breast cancer cells. *J Br Menopause Soc* 9:36-8.
- Seeger H, Wallwiener D, Mueck AO. 2003. The effect of progesterone and synthetic progestins on serum- and estradiol-stimulated proliferation of human breast cancer cells. *Horm Metab Res* 35:76-80.
- Siddique YH, Afzal M. 2008. A Review on the Genotoxic Effects of Some Synthetic Progestins. *Int J Pharmacol* 4: 410-430.
- Siddique YH, Ara G, Beg T, Afzal M. 2006. Genotoxic potential of medroxyprogesterone acetate in cultured human peripheral blood lymphocytes. *Life Sci* 80:212-8.
- Sonneveld E, Jansen HJ, Riteco JA, Brouwer A, van der Burg B. 2005. Development of Androgen- and Estrogen-Responsive Bioassays, Members of a Panel of Human Cell Line-Based Highly Selective Steroid-Responsive Bioassays. *Toxicol Sci* 83:136-48.
- Tseng L, Mazella J, Sun B. 1986. Modulation of Aromatase Activity in Human Endometrial Stromal Cells by Steroids, Tamoxifen and RU 486. *Endocrinology* 118:1312-8.

## **TCDD**

- Adamsson A, Simanainen U, Viluksela M, Paranko J, Toppari J. 2009. The effects of 2,3,7,8-tetrachlorodibenzo-p-dioxin on foetal male rat steroidogenesis. *Int J Androl* 32:575-85.
- Agency for Toxic Substances and Disease Registry (ATSDR). 1998. Toxicological Profile for Chlorinated Dibenzo-p-dioxins (CDDs). Atlanta, GA: U.S. Department of Health and Human Services, Public Health Service. <http://www.atsdr.cdc.gov/toxprofiles/tp104.pdf>. [accessed 29 April 2015]
- Brown NM, Manziolillo PA, Zhang JX, Wang J, Lamartiniere CA. 1998. Prenatal TCDD and predisposition to mammary cancer in the rat. *Carcinogenesis* 19:1623-1629.
- Brunnberg S, Andersson P, Poellinger L, Hanberg A. 2011. The constitutively active Ah receptor (CA-AhR) mouse as a model for dioxin exposure - effects in reproductive organs. *Chemosphere* 85:1701-6.
- Chan CYY, Kim PM and Winn LM. 2004. TCDD Affects DNA Double Strand-Break Repair. *Toxicol. Sci* 81: 133-138.
- Choi EJ, Toscano DG, Ryan JA, Riedel N, Toscano WA Jr. 1991. Dioxin Induces Transforming Growth Factor-alpha in Human Keratinocytes. *J Biol Chem* 266:9591-9597.
- Fenton SE, Hamm JT, Birnbaum LS, Youngblood GL. 2002. Persistent abnormalities in the rat mammary gland following gestational and lactational exposure to 2,3,7,8-tetrachlorodibenzo-p-dioxin (TCDD). *Toxicol Sci* 67:63-74.

IARC. 2012. International Agency for Research on Cancer. A Review of Human Carcinogens: Chemical Agents and Related Occupations. IARC Monographs on the Evaluation of Carcinogenic Risks to Humans. Volume 100F. World Health Organization. Lyon, France.

Jenkins S, Rowell C, Wang J, Lamartiniere CA. 2007. Prenatal TCDD exposure predisposes for mammary cancer in rats. *Reprod Toxicol* 23:391-396.

Katic J, Cemeli E, Baumgartner A, Laubenthal J, Bassano I, Stølevik SB, et al. 2010. Evaluation of the genotoxicity of 10 selected dietary/environmental compounds with the in vitro micronucleus cytokinesis-block assay in an interlaboratory comparison. *Food Chem Toxicol* 48:2612-23.

Lai KP, Wong MH, Wong CK. 2005. Effects of TCDD in modulating the expression of Sertoli cell secretory products and markers for cell-cell interaction. *Toxicology* 206:111-23.

Murk AJ, Legler J, Denison MS, Giesy JP, van de Guchte C, Brouwer A. 1996. Chemical-activated luciferase gene expression (CALUX): a novel in vitro bioassay for Ah receptor active compounds in sediments and pore water. *Fundam Appl Toxicol* 33:149-60.

Takeda T, Taura J, Fujii M, Koga T, Ishii Y, Yamada H. 2011. The effect of maternal exposure to dioxin on fetal steroidogenesis in the steroidogenic organs. *Fukuoka Igaku Zasshi* 102:159-66.

Vanparrys C, Depiereux S, Nadzialek S, Robbens J, Blust R, Kestemont P, et al. 2010. Performance of the flow cytometric E-screen assay in screening estrogenicity of pure compounds and environmental samples. *Sci Total Environ* 408:4451-60.

Vinggaard AM, Hnida C, Larsen JC. 2000. Environmental polycyclic aromatic hydrocarbons affect androgen receptor activation in vitro. *Toxicology* 145:173-83.

Vorderstrasse BA, Fenton SE, Bohn AA, Cundiff JA, Lawrence BP. 2004. A novel effect of dioxin: exposure during pregnancy severely impairs mammary gland differentiation. *Toxicol Sci* 78:248-257.

Warner M, Mocarelli P, Samuels S, Needham L, Brambilla P, Eskenazi B. 2011. Dioxin exposure and cancer risk in the Seveso Women's Health Study. *Environ Health Perspect* 119:1700-1705.

## **DDT**

ATSDR (Agency for Toxic Substances and Disease Registry). 2002. Toxicological profile for DDT, DDE, DDD. Atlanta, GA: U.S. Department of Health and Human Services, Public Health Service.

Brown NM, Lamartiniere CA. 1995. Xenoestrogens alter mammary gland differentiation and cell proliferation in the rat. *Environ Health Perspect* 103:708-713.

Chen CW, Hurd C, Vorobjeikina DP, Arnold SF, Notides AC. 1997. Transcriptional activation of the human estrogen receptor by DDT isomers and metabolites in yeast and MCF-7 cells. *Biochem Pharmacol* 53:1161-72.

Clement J, Okey A. 1974. Reproduction in female rats born to DDT-treated parents. *Bull Environ Contam Toxicol* 12(3):373-377.

Crain DA, Guillette LJ, Rooney AA, Pickford DB. 1997. Alterations in steroidogenesis in alligators (*Alligator mississippiensis*) exposed naturally and experimentally to environmental contaminants. *Environ Health Perspect* 105:528-533.

De Flora S, Zanacchi P, Camoirano A, Benniselli C, and Badolati GS. 1984. Genotoxic activity and potency of 135 compounds in the Ames reversion test and in a bacterial DNA-repair test. *Mutat Res* 133:161-98.

- Duby R, Travis H, Terrill C. 1971. Uterotropic activity of DDT in rats and mink and its influence on reproduction in the rat. *Toxicol Appl Pharmacol* 18:348-355.
- Galindo Reyes JG, Leyva NR, Millan OA, Lazcano GA. 2002. Effects of pesticides on DNA and protein of shrimp larvae *Litopenaeus stylirostris* of the California Gulf. *Ecotoxicol Environ Saf* 53:191-5.
- Guillette LJ, Gross TS, Gross DA, Rooney AA, Percival HF. 1995. Gonadal steroidogenesis in vitro from juvenile alligators obtained from contaminated or control lakes. *Environ Health Perspect* 103:31-36.
- Hassoun E, Bagchi M, Bagchi D, Stohs SJ. 1993. Comparative studies on lipid peroxidation and DNA-single strand breaks induced by lindane, DDT, chlordane and endrin in rats. *Comp Biochem Physiol C* 104:427-31.
- IARC. 1991. International Agency for Research on Cancer. Occupational Exposures in Insecticide Application, and Some Pesticides. IARC Monographs on the Evaluation of Carcinogenic Risks to Humans. Volume 53. World Health Organization. Lyon, France.
- Kelce WR, Stone CR, Laws SC, Gray LE, Kemppainen JA, Wilson EM. 1995. Persistent DDT metabolite p,p'-DDE is a potent androgen receptor antagonist. *Nature* 375:581-5.
- Maness S, McDonnell D, Gaido K. 1998. Inhibition of androgen receptor-dependent transcriptional activity by DDT isomers and methoxychlor in HepG2 human hepatoma cells. *Toxicol Appl Pharmacol* 151:135-42.
- Mrema EJ, Rubino FM, Brambilla G, Moretto A, Tsatsakis AM, Colosio C. 2013. Persistent organochlorinated pesticides and mechanisms of their toxicity. *Toxicology* 307:74-88.
- Nelson JA. 1974. Effects of dichlorodiphenyltrichloroethane (DDT) analogs and polychlorinated biphenyl (PCB) mixture on  $17\beta$ -[3H]estradiol binding to rat uterine receptor. *Biochem Pharmacol* 23:447-51.
- Pérez-Maldonado IN, Díaz-Barriga F, de la Fuente H, González-Amaro R, Calderón J, Yáñez L. 2004. DDT induces apoptosis in human mononuclear cells in vitro and is associated with increased apoptosis in exposed children. *Environ Res* 94:38-46.
- Sanderson JT, Boerma J, Lansbergen GW, van der Berg M. 2002. Induction and inhibition of aromatase activity by various classes of pesticides in H295R human adrenocortical carcinoma cells. *Toxicol Appl Pharmacol* 182:44-54.
- Snedeker SM. Pesticides and Breast Cancer Risk: A Review of DDT, DDE, and Dieldrin. 2001. *Environ Health Persp* 109(S1):35-47.
- Sohoni P, Sumpter J. 1998. Several environmental oestrogens are also anti-androgens. *J Endocrinol* 158:327-39.
- Soto AM, Sonnenschein C, Chung KL, Fernandez MF, Olea N, Serrano FO. 1995. The E-SCREEN assay as a tool to identify estrogens: an update on estrogenic environmental pollutants. *Environ Health Perspect* 103:113-22.
- Wójtowicz AK, Milewicz T, Gregoraszczyk EŁ. 2007. DDT and its metabolite DDE alter steroid hormone secretion in human term placental explants by regulation of aromatase activity. *Toxicol Lett* 173:24-30.

## **PFOA**

Alexander J, Auðunsson GA, Benford D, Cockburn A, Cravedi JP, Dogliotti E, et al. 2008. Perfluorooctane sulfonate (PFOS), perfluorooctanoic acid (PFOA) and their salts: Scientific Opinion of the Panel on Contaminants in the Food chain. The EFSA Journal 653:1-131. Available: <http://www.efsa.europa.eu/de/scdocs/doc/653.pdf> [accessed 29 April 2015].

Bernbrahim-Talla L, Lauby-Secretan B, Loomis D, Guyton K, Grosse Y, Ghissassi FE, Bouvard V, Guha N, Mattock H, Straif K. 2014. Carcinogenicity of perfluorooctanoic acid, tetrafluoroethylene, dichloromethane, 1,2-dichloropropane, and 1,3-propane sultone. *Lancet Onc* 15:924-925.

Dixon D, Reed CE, Moore AB, Gibbs-Flournoy EA, Hines EP, Wallace EA, et al. 2012. Histopathologic changes in the uterus, cervix and vagina of immature CD-1 mice exposed to low doses of perfluorooctanoic acid (PFOA) in a uterotrophic assay. *Reprod Toxicol* 33:506-12.

Henry ND, Fair PA. 2013. Comparison of in vitro cytotoxicity, estrogenicity and anti-estrogenicity of triclosan, perfluorooctane sulfonate and perfluorooctanoic acid. *J Appl Toxicol* 33:265-72.

Klaunig JE, Hocevar BA, Kamendulis LM. 2012. Mode of Action analysis of perfluorooctanoic acid (PFOA) tumorigenicity and Human Relevance. *Reprod Toxicol* 33:410-8.

Kraugerud M, Zimmer KE, Ropstad E, Verhaegen S. 2011. Perfluorinated compounds differentially affect steroidogenesis and viability in the human adrenocortical carcinoma (H295R) in vitro cell assay. *Toxicol Lett* 205:62-8.

NTP. Perfluorooctanoic Acid - M910070. Available: <http://ntp.niehs.nih.gov/testing/status/agents/ts-m910070.html> [accessed 6 May 2015]

Takagi A., Sai K., Umemura T, Hasegawa R, Kurokawa Y. Short-term exposure to the peroxisome proliferators, perfluorooctanoic acid and perfluorodecanoic acid, causes significant increase of 8-hydroxydeoxyguanosine in liver DNA of rats. *Cancer Lett.* 1991 Apr;57(1):55-60.

White SS, Calafat AM, Kuklennyik Z, Villanueva L, Zehr RD, Helfant L, et al. 2007. Gestational PFOA exposure of mice is associated with altered mammary gland development in dams and female offspring. *Toxicol Sci* 96:133-144.

White SS, Kato K, Jia LT, Basden BJ, Calafat AM, Hines EP, et al. 2009. Effects of perfluorooctanoic acid on mouse mammary gland development and differentiation resulting from cross-foster and restricted gestational exposures. *Reprod Toxicol* 27:289-298.

White SS, Stanko JP, Kato K, Calafat AM, Hines EP, Fenton SE. 2011. Gestational and chronic low-dose PFOA exposures and mammary gland growth and differentiation in three generations of CD-1 mice. *Environ Health Perspect* 119:1070-1076.

Yang C, Tan YS, Harkema JR, Haslam SZ. 2009. Differential effects of peripubertal exposure to perfluorooctanoic acid on mammary gland development in C57Bl/6 and Balb/c mouse strains. *Reprod Toxicol* 27:299-306.

Yao X, Zhong L. 2005. Genotoxic risk and oxidative DNA damage in HepG2 cells exposed to perfluorooctanoic acid. *Mutat Res* 587:38-44.

## **Vinyl chloride**

IARC. 2008. International Agency for Research on Cancer. 1,3-Butadiene, Ethylene Oxide and Vinyl Halides (Vinyl Fluoride, Vinyl Chloride and Vinyl Bromide). IARC Monographs on the Evaluation of Carcinogenic Risks to Humans. Volume 97. World Health Organization. Lyon, France.

IARC. 2012. International Agency for Research on Cancer. A Review of Human Carcinogens: Chemical Agents and Related Occupations. IARC Monographs on the Evaluation of Carcinogenic Risks to Humans. Volume 100F. World Health Organization. Lyon, France.

Swenberg JA, Bogdanffy MS, Ham A, Holt S, Kim A, Morinello EJ, et al. 1999. Formation and repair of DNA adducts in vinyl chloride- and vinyl fluoride-induced carcinogenesis. *IARC Sci Publ* 150:29-43.

U.S. Environmental Protection Agency (US EPA). 2000. Toxicological Review Of Vinyl Chloride (Cas No. 75-01-4): In Support Of Summary Information On The Integrated Risk Information System (IRIS). Washington, D.C. EPA/635R-00/004.

## **Arsenic**

Akram Z, Jalali S, Shami SA, Ahmad L, Batool S, Kalsoom O. 2010. Adverse effects of arsenic exposure on uterine function and structure in female rat. *Exp Toxicol Pathol* 62:451-9.

Chang SI, Jin B, Youn P, Park C, Park JD, Ryu DY. 2007. Arsenic-induced toxicity and the protective role of ascorbic acid in mouse testis. *Toxicol Appl Pharmacol* 218:196-203.

Chattopadhyay S, Pal Ghosh S, Ghosh D, Debnath J. 2003. Effect of dietary co-administration of sodium selenite on sodium arsenite-induced ovarian and uterine disorders in mature albino rats. *Toxicol Sci* 75:412-22.

IARC. 2004. International Agency for Research on Cancer. Some Drinking-water Disinfectants and Contaminants, including Arsenic. IARC Monographs on the Evaluation of Carcinogenic Risks to Humans. Volume 84. World Health Organization. Lyon, France.

IARC. 2012. International Agency for Research on Cancer. A Review of Human Carcinogens: Arsenic, Metals, Fibres, and Dusts. IARC Monographs on the Evaluation of Carcinogenic Risks to Humans. Volume 100C. World Health Organization. Lyon, France.

Mo J, Xia Y, Ning Z, Wade TJ, Mumford JL. 2009. Elevated human telomerase reverse transcriptase gene expression in blood cells associated with chronic arsenic exposure in Inner Mongolia, China. *Environ Health Perspect* 117:354-60.

OEHHA. 2004. Public Health Goals for Chemicals in Drinking Water: Arsenic. Sacramento, CA: Office of Environmental Health Hazard Assessment, California Environmental Protection Agency.

Rosenblatt AE, Burnstein KL. 2009. Inhibition of androgen receptor transcriptional activity as a novel mechanism of action of arsenic. *Mol Endocrinol* 23:412-21.

Shen J, Liu J, Xie Y, Diwan BA, Waalkes MP. 2007. Fetal onset of aberrant gene expression relevant to pulmonary carcinogenesis in lung adenocarcinoma development induced by in utero arsenic exposure. *Toxicol Sci* 95:313-20.

Smith AH, Marshall G, Yuan Y, Steinmaus C, Liaw J, Smith MT, et al. 2014. Rapid Reduction in Breast Cancer Mortality with Inorganic Arsenic in Drinking Water. *EBioMedicine* 1 (1): 58-63.

Stoica A, Pentecost E, Martin MB. 2000. Effects of Arsenite on Estrogen Receptor-alpha Expression and Activity in MCF-7 Breast Cancer Cells. *Endocrinology* 141: 3595-3602.

Wang TS, Hsu TY, Chung CH, Wang AS, Bau DT, Jan KY. 2001. Arsenite induces oxidative DNA adducts and DNA-protein cross-links in mammalian cells. *Free Radic Biol Med* 31:321-30.

Yih LH, Tseng YY, Wu YC, Lee TC. 2006. Induction of centrosome amplification during arsenite-induced mitotic arrest in CGL-2 cells. *Cancer Res* 66:2098-106.

## **Caprolactam**

IARC. 1999. International Agency for Research on Cancer. Re-evaluation of Some Organic Chemicals, Hydrazine and Hydrogen Peroxide. IARC Monographs on the Evaluation of Carcinogenic Risks to Humans. Volume 71. World Health Organization. Lyon, France.

Williams GM, Mori H, McQueen CA. 1989. Structure-activity relationships in the rat hepatocyte DNA-repair test for 300 chemicals. *Mutat Res* 221:263-86.
